# Supplementary material
Source: PubMed Central journal article supplement (PMC5812273)
Supplement: NIHMS934268-supplement-supplemental_data.pdf [file NIHMS934268-supplement-supplemental_data.pdf]

## **Supplemental Information**

| <b>Kit Name</b>                                   | <b>Manufacturer</b> | <b>Catalog #</b> | <b>Manufacturer Protocol #</b> |
|---------------------------------------------------|---------------------|------------------|--------------------------------|
| Total Bile Acid (TBA) Enzymatic Cycling Kit Assay | Bioquant            | BQ 042A-EALD     | 1435702385                     |
| Liquid ALT (SGPT) Reagent Set                     | Pointe Scientific   | A7526            | P803-A7526-01 Rev. 12/09       |
| Alkaline Phosphatase (Liquid) Reagent Set         | Pointe Scientific   | A7516            | P803-A7516-01 Rev. 11/11       |
| Cholesterol (Liquid) Reagent Set                  | Pointe Scientific   | C7510            | P803-C7510-01 Rev. 11/11       |
| Triglyceride (GPO)(Liquid) Reagent Set            | Pointe Scientific   | T7532            | P803-T7532-01 Rev. 12/09       |
| TriZOL Reagent                                    | Thermo Fisher Sci.  | 15596018         | MAN00001271 Rev. A             |

### Oral Glucose Tolerance Test:

Mice were fasted overnight and then given an oral gavage of 20% glucose solution (10 uL/g bodyweight; 2 mg glucose/gram body weight). A drop of blood was collected from the tail 0, 15, 30, 60 and 120 minutes post gavage. Blood was immediately analyzed using a glucometer to measure blood glucose levels.

### Oil Red O Stain:

Frozen livers were sectioned at 8 microns and fixed in formalin. Oil Red O working solution was created by diluting 30 mL of stock stain (0.5% Oil Red O in isopropanol) in 20 mL of mH<sub>2</sub>O. Slides were rinsed with 60% isopropanol and stained with freshly prepared Oil Red O working solution for 15 minutes. Slides were rinsed with 60% isopropanol and then counterstained with hematoxylin.

### Immunohistochemistry staining of Desmin:

Liver sections were deparaffinized in xylene and rehydrated. Antigen retrieval was performed using 10 mM citrate buffer for 10 minutes. Endogenous peroxidase activity was quenched using 3% H<sub>2</sub>O<sub>2</sub> for 15 minutes. Sections were blocked with 10% normal rabbit serum in PBS for 2.5 hours at room temperature. Sections were incubated with 1:100 goat anti-desmin (PIPA519063; Thermo Fisher Scientific, Waltham, MA) primary antibody in 5% rabbit serum overnight at 4°C. Slides were incubated with anti-goat secondary for 30 minutes and then ABC reagent for 30 minutes (Vectastain Kit; Vector Laboratories, Burlingame, CA). Slides were then stained with DAB. Nuclei were counterstained with hematoxylin. Slides were dehydrated and mounted.

Supplemental Table 1: NAFLD Activity Scores. Data presented as average score (SD).

|                                 | <b>Lipid Accumulation</b> | <b>Hepatocyte Ballooning and Necrosis</b> | <b>Inflammation</b> | <b>Overall</b> |
|---------------------------------|---------------------------|-------------------------------------------|---------------------|----------------|
| <b>WT Chow</b>                  | 0.25 (0.5)                | 0 (0)                                     | 0 (0)               | 0.25 (0.5)     |
| <b>WT HFD</b>                   | 2.8 (0.4)                 | 0.8 (0.4)                                 | 0.4 (0.5)           | 4 (1.2)        |
| <b>Fgf15<sup>-/-</sup> Chow</b> | 0.25 (0.5)                | 0 (0)                                     | 0.25 (0.5)          | 0.5 (0.6)      |
| <b>Fgf15<sup>-/-</sup> HFD</b>  | 2.75 (0.5)                | 0.5 (0.6)                                 | 1 (0.8)             | 4.25 (1.8)     |
